# Supplementary material
Source: publisher figshare collection journal article supplement (https://karger.figshare.com/ndownloader/files/17035136)
Supplement: Supplementary file 1 [file 17035136]

| Homo sapiens ABL proto-oncogene 1, non-receptor tyrosine kinase (ABL1) | |
| --- | --- |
| Transcript variant a, mRNA (NCBI Reference Sequence: NM_005157.5) | Transcript variant b, mRNA (NCBI Reference Sequence: NM_007313.2) |
| (a)  1 ttaacaggcg cgtcccggcc aggcggagac gcggccgcgg ccatgggcgg gcgcgggcgc  61 gcggggcggc ggtgagggcg gctggcgggg ccgg**gggcgc cgggggggcg cgcg**ggccga  121 gccgggcctg agccgggccc gcggaccgag ctgggagagg gg**t**tccggcc cccgacgtgc  181 tggcgcggga aaatgttgga gatctgcctg aagctggtgg gctgcaaatc caagaagggg  **Bieurnax (c,f) *181** tggcgcggga aaatgttgga gatctgcctg aagctggtg**g gctgcaaatc** **caagaagggg**  **Bose (c,f) *181** tggcgcggga aaatg**ttgga** **gatct*g*cctg** **aag**ctggtgg gctgcaaatc caagaagggg  **Song (c,f1.1) *181** tggcgcggga aaatgttgga g**atctgcctg** **aagctggtgg** **gct**gcaaatc caagaagggg  **Ismail (c,f) *181** tggcgcggga aaatgttgga gatctgcctg aagctggtgg g**ctgcaaatc** **caagaagggg**  241 ctgtcctcgt cctccagctg ttatctggaa gaagcccttc agcggccagt agcatctgac  **Bieurnax (c,f) *241** **ctgt**cctcgt cctccagctg ttatctggaa gaagcccttc agcggccagt agcatctgac  **Song (c,f1.3) *241** ctgtcctcgt cctccagctg ttatctggaa gaagccctt**c agcggccagt** **agcatctgac**  **Ismail (c,f) *241** **ctg**tcctcgt cctccagctg ttatctggaa gaagcccttc agcggccagt agcatctgac  301 tttgagcctc agggtctgag tgaagccgct cgttggaact ccaaggaaaa ccttctcgct  **Song (c,f1.3) *301** **t**ttgagcctc agggtctgag tgaagccgct cgttggaact ccaaggaaaa ccttctcgct  **Song (c,f2.1) *301** tttgagcctc agggtctg**a*g* tgaagccgct cgttggaact** **ccaa**ggaaaa ccttctcgct  **Song (c,f2.2) *301** tttga**gcctc** **agggtctgag tgaagccgct** **cgttg**gaact ccaaggaaaa ccttctcgct  **Uckun (m 2) *301** tttgagcctc ag**ggtctgag** **tgaagccgct** **cg**ttggaact ccaaggaaaa ccttctcgct  **Kosik *301** t**ttgagcctc** **agggtctgag tg**aagccgct cgttggaact ccaaggaaaa ccttctcgct  361 ggacccagtg aaaatgaccc caaccttttc gttgcactgt atgattttgt ggccagtgga  **Bieurnax (2) *361** ggacccagtg aaaatgaccc caacctttt**c** **gttgcactgt** **atgattttgt** **ggcc**agtgga  **Ravetto (2) *361** ggacccagtg aaaatgaccc caaccttttc gttgc**actgt atgattttgt** **ggccagtgga**  **Song (2.1) *361** ggacccagtg aaaatgaccc caaccttttc gttgcac**tgt** **atgatttt*g*t** **ggcca*g*tgga**  **Boquett (1) *361** ggacccagtg aaaatgaccc caaccttttc gttgcactgt atg**attttgt** **ggccagtgga**  **Boquett (2) *361** ggacccagtg aaaatgaccc caaccttttc gttgca**ctgt** **atgattttgt ggccagtgga**  **Ismail (m 2) *361** ggacccagtg aaaatgaccc caaccttttc gttgcact**gt atgattttgt ggcc**agtgga  421 gataacactc taagcataac **t**aaaggtgaa aagctccggg tcttaggcta taatcacaat  **Bieurnax (1) *421** gataacactc taagcataac taaaggtgaa aag**ctccggg** **tcttaggcta** **ta*a*tcac*a***at  **Ravetto (1) *421** gataacactc taagcataac taaaggtgaa aag**ctccggg** **tcttaggcta taatcaca**at  **Hsu (2) *421** gataacactc taagcataac taaaggtgaa aagctccggg tct**taggcta** **taatcacaat**  **Song (1.1) *421** gataacactc taagcataac taaaggtgaa aagc**tccggg** **tcttaggcta taatca**caat  **Song (2.1) *421** **gat**aacactc taagcataac taaaggtgaa aagctccggg tcttaggcta taatcacaat  **Song (2.2) *421** gataacactc taagcataac taaaggt**gaa** **aagctccggg tcttaggcta** **taatcaca**at  **Boquett (1) *421 g**ataacactc taagcataac taaaggtgaa aagctccggg tcttaggcta taatcacaat  **Boquett (2) *421 g**ataacactc taagcataac taaaggtgaa aagctccggg tcttaggcta taatcacaat  **Uckun (m 1) *421** gataacactc taagcataac taaaggtgaa aag**ctccggg tcttaggcta** **taatcaca**at  481 ggggaatggt gtgaagccca aaccaaaaat ggccaaggct gggtcccaag caactacatc  **Bose (2) *481** ggggaatggt gtgaagccca aaccaaaaat ggccaaggct gggtc**ccaag** **caactacatc**  **Hsu (1) *481** gg**ggaatggt gtgaagccca aac**caaaaat ggccaaggct gggtcccaag caactacatc  **Hsu (2) *481** **ggggaa**tggt gtgaagccca aaccaaaaat ggccaaggct gggtcccaag caactacatc  **le Coutre (2) *481** ggggaatggt gtgaagccca aaccaaaaat ggccaaggct gggtc**ccaag** **caactacatc**  **Song (1.2) *481** gg**ggaatggt gtgaagccca aaccaaaaat gg**ccaaggct gggtcccaag caactacatc  **Ismail (1) *481** ggggaatggt gtgaagccca aaccaaaaat ggccaaggct gggtc**ccaag** **caactacatc**  **Ismail (2) *481** **ggggaatggt gtgaa**gccca aaccaaaaat ggccaaggct gggtcccaag caactacatc  541 acgccagtca acagtctgga gaaacactcc tggtaccatg ggcctgtgtc ccgcaatgcc  **Bose (1) *541** acgccagtca a**cagtctgga gaaacactcc tggtacc**atg ggcctgtgtc ccgcaatgcc  **Bose (2) *541** **acgccagtca** **aca**gtctgga gaaacactcc tggtaccatg ggcctgtgtc ccgcaatgcc  **Bose (c,r) *541** acgccagt**ca acagtctgga** **gaaacactc**c tggtaccatg ggcctgtgtc ccgcaatgcc  **le Coutre (1) *541** acgccagtca a**cagtctgga gaaacactcc** **tggtacc**atg ggcctgtgtc ccgcaatgcc  **le** **Coutre (2) *541** **acgccagtca aca**gtctgga gaaacactcc tggtaccatg ggcctgtgtc ccgcaatgcc  **Ismail (1) *541** **acgccagtca aca**gtctgga gaaacactcc tggtaccatg ggcctgtgtc ccgcaatgcc  601 gctgagtatc tgctgagcag cgggatcaat ggcagcttct tggtgcgtga gagtgagagc  661 agtcctggcc agaggtccat ctcgctgaga tacgaaggga gggtgtacca ttacaggatc  721 aacactgctt ctgatggcaa gctctacgtc tcctccgaga gccgcttcaa caccctggcc  781 gagttggttc atcatcattc aacggtggcc gacgggctca tcaccacgct ccattatcca  841 gccccaaagc gcaacaagcc cactgtctat ggtgtgtccc ccaactacga caagtgggag  901 atggaacgca cggacatcac catgaagcac aagctgggcg ggggccagta cggggaggtg  961 tacgagggcg tgtggaagaa atacagcctg acggtggccg tgaagacctt gaaggaggac  1021 accatggagg tggaagagtt cttgaaagaa gctgcagtca tgaaagagat caaacaccct  1081 aacctggtgc agctccttgg ggtctgcacc cgggagcccc cgttctatat catcactgag  1141 ttcatgacct acgggaacct cctggactac ctgagggagt gcaaccggca ggaggtgaac  1201 gccgtggtgc tgctgtacat ggccactcag atctcgtcag ccatggagta cctggagaag  1261 aaaaacttca tccacagaga tcttgctgcc cgaaactgcc tggtagggga gaaccacttg  1321 gtgaaggtag ctgattttgg cctgagcagg ttgatgacag gggacaccta cacagcccat  1381 gctggagcca agttccccat caaatggact gcacccgaga gcctggccta caacaagttc  1441 tccatcaagt ccgacgtctg ggcatttgga gtattgcttt gggaaattgc tacctatggc  1501 atgtcccctt acccgggaat tgacctgtcc caggtgtatg agctgctaga gaaggactac  1561 cgcatggagc gcccagaagg ctgcccagag aaggtctatg aactcatgcg agcatgttgg  1621 cagtggaatc cctctgaccg gccctccttt gctgaaatcc accaagcctt tgaaacaatg  1681 ttccaggaat ccagtatctc agacgaagtg gaaaaggagc tggggaaaca aggcgtccgt  1741 ggggctgtga gtaccttgct gcaggcccca gagctgccca ccaagacgag gacctccagg  1801 agagctgcag agcacagaga caccactgac gtgcctgaga tgcctcactc caagggccag  1861 ggagagagcg atcctctgga ccatgagcct gccgtgtctc cattgctccc tcgaaaagag  1921 cgaggtcccc cggagggcgg cctgaatgaa gatgagcgcc ttctccccaa agacaaaaag  1981 accaacttgt tcagcgcctt gatcaagaag aagaagaaga cagccccaac ccctcccaaa  2041 cgcagcagct ccttccggga gatggacggc cagccggagc gcagaggggc cggcgaggaa  2101 gagggccgag acatcagcaa cggggcactg gctttcaccc ccttggacac agctgaccca  2161 gccaagtccc caaagcccag caatggggct ggggtcccca atggagccct ccgggagtcc  2221 gggggctcag gcttccggtc tccccacctg tggaagaagt ccagcacgct gaccagcagc  2281 cgcctagcca ccggcgagga ggagggcggt ggcagctcca gcaagcgctt cctgcgctct  2341 tgctccgcct cctgcgttcc ccatggggcc aaggacacgg agtggaggtc agtcacgctg  2401 cctcgggact tgcagtccac gggaagacag tttgactcgt ccacatttgg agggcacaaa  2461 agtgagaagc cggctctgcc tcggaagagg gcaggggaga acaggtctga ccaggtgacc  2521 cgaggcacag taacgcctcc ccccaggctg gtgaaaaaga atgaggaagc tgctgatgag  2581 gtcttcaaag acatcatgga gtccagcccg ggctccagcc cgcccaacct gactccaaaa  2641 cccctccggc ggcaggtcac cgtggcccct gcctcgggcc tcccccacaa ggaagaagct  2701 ggaaagggca gtgccttagg gacccctgct gcagctgagc cagtgacccc caccagcaaa  2761 gcaggctcag gtgcaccagg gggcaccagc aagggccccg ccgaggagtc cagagtgagg  2821 aggcacaagc actcctctga gtcgccaggg agggacaagg ggaaattgtc caggctcaaa  2881 cctgccccgc cgcccccacc agcagcctct gcagggaagg ctggaggaaa gccctcgcag  2941 agcccgagcc aggaggcggc cggggaggca gtcctgggcg caaagacaaa agccacgagt  3001 ctggttgatg ctgtgaacag tgacgctgcc aagcccagcc agccgggaga gggcctcaaa  3061 aagcccgtgc tcccggccac tccaaagcca cagtccgcca agccgtcggg gacccccatc  3121 agcccagccc ccgttccctc cacgttgcca tcagcatcct cggccctggc aggggaccag  3181 ccgtcttcca ccgccttcat ccctctcata tcaacccgag tgtctcttcg gaaaacccgc  3241 cagcctccag agcggatcgc cagcggcgcc atcaccaagg gcgtggtcct ggacagcacc  3301 gaggcgctgt gcctcgccat ctctaggaac tccgagcaga tggccagcca cagcgcagtg  3361 ctggaggccg gcaaaaacct ctacacgttc tgcgtgagct atgtggattc catccagcaa  3421 atgaggaaca agtttgcctt ccgagaggcc atcaacaaac tggagaataa tctccgggag  3481 cttcagatct gcccggcgac agcaggcagt ggtccagcgg ccactcagga cttcagcaag  3541 ctcctcagtt cggtgaagga aatcagtgac atagtgcaga ggtagcagca gtcaggggtc  3601 aggtgtcagg cccgtcggag ctgcctgcag cacatgcggg ctcgcccata cccgtgacag  3661 tggctgacaa gggactagtg agtcagcacc ttggcccagg agctctgcgc caggcagagc  3721 tgagggccct gtggagtcca gctctactac ctacgtttgc accgcctgcc ctcccgcacc  3781 ttcctcctcc ccgctccgtc tctgtcctcg aattttatct gtggagttcc tgctccgtgg  3841 actgcagtcg gcatgccagg acccgccagc cccgctccca cctagtgccc cagactgagc  3901 tctccaggcc aggtgggaac ggctgatgtg gactgtcttt ttcatttttt tctctctgga  3961 gcccctcctc ccccggctgg gcctccttct tccacttctc caagaatgga agcctgaact  4021 gaggccttgt gtgtcaggcc ctctgcctgc actccctggc cttgcccgtc gtgtgctgaa  4081 gacatgtttc aagaaccgca tttcgggaag ggcatgcacg ggcatgcaca cggctggtca  4141 ctctgccctc tgctgctgcc cggggtgggg tgcactcgcc atttcctcac gtgcaggaca  4201 gctcttgatt tgggtggaaa acagggtgct aaagccaacc agcctttggg tcctgggcag  4261 gtgggagctg aaaaggatcg aggcatgggg catgtccttt ccatctgtcc acatccccag  4321 agcccagctc ttgctctctt gtgacgtgca ctgtgaatcc tggcaagaaa gcttgagtct  4381 caagggtggc aggtcactgt cactgccgac atccctcccc cagcagaatg gaggcagggg  4441 acaagggagg cagtggctag tggggtgaac agctggtgcc aaatagcccc agactgggcc  4501 caggcaggtc tgcaagggcc cagagtgaac cgtcctttca cacatctggg tgccctgaaa  4561 gggcccttcc cctcccccac tcctctaaga caaagtagat tcttacaagg ccctttcctt  4621 tggaacaaga cagccttcac ttttctgagt tcttgaagca tttcaaagcc ctgcctctgt  4681 gtagccgccc tgagagagaa tagagctgcc actgggcacc tgcgcacagg tgggaggaaa  4741 gggcctggcc agtcctggtc ctggctgcac tcttgaactg ggcgaatgtc ttatttaatt  4801 accgtgagtg acatagcctc atgttctgtg ggggtcatca gggagggtta ggaaaaccac  4861 aaacggagcc cctgaaagcc tcacgtattt cacagagcac gcctgccatc ttctccccga  4921 ggctgcccca ggccggagcc cagatacggg ggctgtgact ctgggcaggg acccggggtc  4981 tcctggacct tgacagagca gctaactccg agagcagtgg gcaggtggcc gcccctgagg  5041 cttcacgccg ggagaagcca ccttcccacc ccttcatacc gcctcgtgcc agcagcctcg  5101 cacaggccct agctttacgc tcatcaccta aacttgtact ttatttttct gatagaaatg  5161 gtttcctctg gatcgtttta tgcggttctt acagcacatc acctctttgc ccccgacggc  5221 tgtgacgcag ccggagggag gcactagtca ccgacagcgg ccttgaagac agagcaaagc  5281 gcccacccag gtcccccgac tgcctgtctc catgaggtac tggtcccttc cttttgttaa  5341 cgtgatgtgc cactatattt tacacgtatc tcttggtatg catcttttat agacgctctt  5401 ttctaagtgg cgtgtgcata gcgtcctgcc ctgccccctc gggggcctgt ggtggctccc  5461 cctctgcttc tcggggtcca gtgcattttg tttctgtata tgattctctg tggttttttt  5521 tgaatccaaa tctgtcctct gtagtatttt ttaaataaat cagtgtttac attagaaaaa  5581 aaaaaaaaaa aaaaaa | (b)  1 ggttggtgac ttccacagga aaagttctgg aggagtagcc aaagaccatc agcgtttcct  61 ttatgtgtga gaattgaaat gactagcatt attgaccctt ttcagcatcc cctgtgaata  121 tttctgttta ggtttttctt cttgaaaaga aattgttatt cagcccgttt aaaacaaatc  181 aagaaacttt tgggtaacat tgcaattaca tgaaattgat aaccgcgaaa ataattggaa  241 ctcctgcttg caagtgtcaa cctaaaaaaa gtgcttcctt ttgttatgga agatgtcttt  301 ctgtgattga cttcaattgc tgacttgtgg agatgcagcg aatgtgaaat cccacgtata  361 tgccatttcc ctctacgctc gctgaccgtt ctggaagatc ttgaaccctc ttctggaaag  421 gggtacctat tattacttta tggggcagca gcctggaaaa gtacttgggg accaaagaag  **Song (c,f1.2) *421** gggtacctat tattacttta tggg**gcagca** **gcctggaaaa** **gtactt**gggg accaaagaag  481 gccaagcttg cctgccctgc attttatcaa aggagcaggg aagaaggaat catcgaggca  541 tgggggtcca cactgcaatg tttttgtgga acatgaagcc cttcagcggc cagtagcatc  601 tgactttgag cctcagggtc tgagtgaagc cgctcgttgg aactccaagg aaaaccttct  661 cgctggaccc agtgaaaatg accccaacct tttcgttgca ctgtatgatt ttgtggccag  721 tggagataac actctaagca taactaaagg tgaaaagctc cgggtcttag gctataatca  781 caatggggaa tggtgtgaag cccaaaccaa aaatggccaa ggctgggtcc caagcaacta  841 catcacgcca gtcaacagtc tggagaaaca ctcctggtac catgggcctg tgtcccgcaa  901 tgccgctgag tatctgctga gcagcgggat caatggcagc ttcttggtgc gtgagagtga  961 gagcagtcct ggccagaggt ccatctcgct gagatacgaa gggagggtgt accattacag  1021 gatcaacact gcttctgatg gcaagctcta cgtctcctcc gagagccgct tcaacaccct  1081 ggccgagttg gttcatcatc attcaacggt ggccgacggg ctcatcacca cgctccatta  1141 tccagcccca aagcgcaaca agcccactgt ctatggtgtg tcccccaact acgacaagtg  1201 ggagatggaa cgcacggaca tcaccatgaa gcacaagctg ggcgggggcc agtacgggga  1261 ggtgtacgag ggcgtgtgga agaaatacag cctgacggtg gccgtgaaga ccttgaagga  1321 ggacaccatg gaggtggaag agttcttgaa agaagctgca gtcatgaaag agatcaaaca  1381 ccctaacctg gtgcagctcc ttggggtctg cacccgggag cccccgttct atatcatcac  1441 tgagttcatg acctacggga acctcctgga ctacctgagg gagtgcaacc ggcaggaggt  1501 gaacgccgtg gtgctgctgt acatggccac tcagatctcg tcagccatgg agtacctgga  1561 gaagaaaaac ttcatccaca gagatcttgc tgcccgaaac tgcctggtag gggagaacca  1621 cttggtgaag gtagctgatt ttggcctgag caggttgatg acaggggaca cctacacagc  1681 ccatgctgga gccaagttcc ccatcaaatg gactgcaccc gagagcctgg cctacaacaa  1741 gttctccatc aagtccgacg tctgggcatt tggagtattg ctttgggaaa ttgctaccta  1801 tggcatgtcc ccttacccgg gaattgacct gtcccaggtg tatgagctgc tagagaagga  1861 ctaccgcatg gagcgcccag aaggctgccc agagaaggtc tatgaactca tgcgagcatg  1921 ttggcagtgg aatccctctg accggccctc ctttgctgaa atccaccaag cctttgaaac  1981 aatgttccag gaatccagta tctcagacga agtggaaaag gagctgggga aacaaggcgt  2041 ccgtggggct gtgagtacct tgctgcaggc cccagagctg cccaccaaga cgaggacctc  2101 caggagagct gcagagcaca gagacaccac tgacgtgcct gagatgcctc actccaaggg  2161 ccagggagag agcgatcctc tggaccatga gcctgccgtg tctccattgc tccctcgaaa  2221 agagcgaggt cccccggagg gcggcctgaa tgaagatgag cgccttctcc ccaaagacaa  2281 aaagaccaac ttgttcagcg ccttgatcaa gaagaagaag aagacagccc caacccctcc  2341 caaacgcagc agctccttcc gggagatgga cggccagccg gagcgcagag gggccggcga  2401 ggaagagggc cgagacatca gcaacggggc actggctttc acccccttgg acacagctga  2461 cccagccaag tccccaaagc ccagcaatgg ggctggggtc cccaatggag ccctccggga  2521 gtccgggggc tcaggcttcc ggtctcccca cctgtggaag aagtccagca cgctgaccag  2581 cagccgccta gccaccggcg aggaggaggg cggtggcagc tccagcaagc gcttcctgcg  2641 ctcttgctcc gcctcctgcg ttccccatgg ggccaaggac acggagtgga ggtcagtcac  2701 gctgcctcgg gacttgcagt ccacgggaag acagtttgac tcgtccacat ttggagggca  2761 caaaagtgag aagccggctc tgcctcggaa gagggcaggg gagaacaggt ctgaccaggt  2821 gacccgaggc acagtaacgc ctccccccag gctggtgaaa aagaatgagg aagctgctga  2881 tgaggtcttc aaagacatca tggagtccag cccgggctcc agcccgccca acctgactcc  2941 aaaacccctc cggcggcagg tcaccgtggc ccctgcctcg ggcctccccc acaaggaaga  3001 agctggaaag ggcagtgcct tagggacccc tgctgcagct gagccagtga cccccaccag  3061 caaagcaggc tcaggtgcac cagggggcac cagcaagggc cccgccgagg agtccagagt  3121 gaggaggcac aagcactcct ctgagtcgcc agggagggac aaggggaaat tgtccaggct  3181 caaacctgcc ccgccgcccc caccagcagc ctctgcaggg aaggctggag gaaagccctc  3241 gcagagcccg agccaggagg cggccgggga ggcagtcctg ggcgcaaaga caaaagccac  3301 gagtctggtt gatgctgtga acagtgacgc tgccaagccc agccagccgg gagagggcct  3361 caaaaagccc gtgctcccgg ccactccaaa gccacagtcc gccaagccgt cggggacccc  3421 catcagccca gcccccgttc cctccacgtt gccatcagca tcctcggccc tggcagggga  3481 ccagccgtct tccaccgcct tcatccctct catatcaacc cgagtgtctc ttcggaaaac  3541 ccgccagcct ccagagcgga tcgccagcgg cgccatcacc aagggcgtgg tcctggacag  3601 caccgaggcg ctgtgcctcg ccatctctag gaactccgag cagatggcca gccacagcgc  3661 agtgctggag gccggcaaaa acctctacac gttctgcgtg agctatgtgg attccatcca  3721 gcaaatgagg aacaagtttg ccttccgaga ggccatcaac aaactggaga ataatctccg  3781 ggagcttcag atctgcccgg cgacagcagg cagtggtcca gcggccactc aggacttcag  3841 caagctcctc agttcggtga aggaaatcag tgacatagtg cagaggtagc agcagtcagg  3901 ggtcaggtgt caggcccgtc ggagctgcct gcagcacatg cgggctcgcc catacccgtg  3961 acagtggctg acaagggact agtgagtcag caccttggcc caggagctct gcgccaggca  4021 gagctgaggg ccctgtggag tccagctcta ctacctacgt ttgcaccgcc tgccctcccg  4081 caccttcctc ctccccgctc cgtctctgtc ctcgaatttt atctgtggag ttcctgctcc  4141 gtggactgca gtcggcatgc caggacccgc cagccccgct cccacctagt gccccagact  4201 gagctctcca ggccaggtgg gaacggctga tgtggactgt ctttttcatt tttttctctc  4261 tggagcccct cctcccccgg ctgggcctcc ttcttccact tctccaagaa tggaagcctg  4321 aactgaggcc ttgtgtgtca ggccctctgc ctgcactccc tggccttgcc cgtcgtgtgc  4381 tgaagacatg tttcaagaac cgcatttcgg gaagggcatg cacgggcatg cacacggctg  4441 gtcactctgc cctctgctgc tgcccggggt ggggtgcact cgccatttcc tcacgtgcag  4501 gacagctctt gatttgggtg gaaaacaggg tgctaaagcc aaccagcctt tgggtcctgg  4561 gcaggtggga gctgaaaagg atcgaggcat ggggcatgtc ctttccatct gtccacatcc  4621 ccagagccca gctcttgctc tcttgtgacg tgcactgtga atcctggcaa gaaagcttga  4681 gtctcaaggg tggcaggtca ctgtcactgc cgacatccct cccccagcag aatggaggca  4741 ggggacaagg gaggcagtgg ctagtggggt gaacagctgg tgccaaatag ccccagactg  4801 ggcccaggca ggtctgcaag ggcccagagt gaaccgtcct ttcacacatc tgggtgccct  4861 gaaagggccc ttcccctccc ccactcctct aagacaaagt agattcttac aaggcccttt  4921 cctttggaac aagacagcct tcacttttct gagttcttga agcatttcaa agccctgcct  4981 ctgtgtagcc gccctgagag agaatagagc tgccactggg cacctgcgca caggtgggag  5041 gaaagggcct ggccagtcct ggtcctggct gcactcttga actgggcgaa tgtcttattt  5101 aattaccgtg agtgacatag cctcatgttc tgtgggggtc atcagggagg gttaggaaaa  5161 ccacaaacgg agcccctgaa agcctcacgt atttcacaga gcacgcctgc catcttctcc  5221 ccgaggctgc cccaggccgg agcccagata cgggggctgt gactctgggc agggacccgg  5281 ggtctcctgg accttgacag agcagctaac tccgagagca gtgggcaggt ggccgcccct  5341 gaggcttcac gccgggagaa gccaccttcc caccccttca taccgcctcg tgccagcagc  5401 ctcgcacagg ccctagcttt acgctcatca cctaaacttg tactttattt ttctgataga  5461 aatggtttcc tctggatcgt tttatgcggt tcttacagca catcacctct ttgcccccga  5521 cggctgtgac gcagccggag ggaggcacta gtcaccgaca gcggccttga agacagagca  5581 aagcgcccac ccaggtcccc cgactgcctg tctccatgag gtactggtcc cttccttttg  5641 ttaacgtgat gtgccactat attttacacg tatctcttgg tatgcatctt ttatagacgc  5701 tcttttctaa gtggcgtgtg catagcgtcc tgccctgccc cctcgggggc ctgtggtggc  5761 tccccctctg cttctcgggg tccagtgcat tttgtttctg tatatgattc tctgtggttt  5821 tttttgaatc caaatctgtc ctctgtagta ttttttaaat aaatcagtgt ttacattaga  5881 a |
| Green highlighted sequence = sequence in exon 1a, i.e. the sequence that is different between variant a and b (1 – 271)  Blue highlighted sequence = sequence in exon 2 (272 – 445)  Grey highlighted sequence = sequence in exon 3 (446 – 741) | Green highlighted sequence = sequence in exon 1b, i.e. the sequence that is different between variant a and b (1 – 575)  *Note: all the other primers not involving exon 1b were shown in Figure 6(a).* |
| 1. = used in first run; **(2)** = used in second run; **(c,f)** = nucleotide sequence used as control, forward in the study; **(c,r)** = nucleotide sequence used as control, reverse in the study; **(m)** = used in m-BCR   ***Italic*** = different nucleotide sequence was used in the study  t, c, a, g = single nucleotide variant (**t, c, a, g** if frequency ≥1% (based on ExAC MAF)); x = nucleotides with insertion / deletion polymorphism (**x** if frequency ≥1% (based on ExAC MAF)) [retrieved 18th - 28th November 2018 from NCBI  <https://www.ncbi.nlm.nih.gov/variation/view/?q=ABL1&filters=source%3Adbsnp&assm=GCF_000001405.26>.  Location of nucleotides in transcript in reference to coding DNA was cross-checked on 18th November 2018 from NCBI  <https://www.ncbi.nlm.nih.gov/projects/SNP/snp_ref.cgi?geneId=25&ctg=NT_008470.20&mrna=NM_005157.5&prot=NP_005148.2&orien=forward>] | |

Supplementary Figure 2. Primer sequence used in the studies in reference to the ABL1 sequence (a) transcript variant a NM_005157.5 (retrieved 24th October 2018 from NCBI <https://www.ncbi.nlm.nih.gov/nuccore/NM_005157.5>), (b) transcript variant b NM_007313.2 (retrieved 14th May 2018 from NCBI <https://www.ncbi.nlm.nih.gov/nuccore/NM_007313>)
